# Supplementary material
Source: PubMed Central journal article supplement (PMC5021114)
Supplement: AJPA-160-220-s001.pdf [file AJPA-160-220-s001.pdf]

## Supplementary Information

### **Successful enrichment and recovery of whole mitochondrial genomes from ancient human dental calculus**

Andrew T. Ozga, Maria A. Nieves-Colón, Tanvi P. Honap, Krithivasan Sankaranarayanan, George Milner, Courtney Hofman, Cecil M. Lewis, Jr., Anne C. Stone, Christina Warinner

SI correspondence to:  
Christina Warinner, [twarinner@gmail.com](mailto:twarinner@gmail.com)

**Supplementary Table 1. DNA library substitution error rates**

|                                                                                                                                                         | Sample               | Tissue   | Total Reads | HQ Aligned Reads <sup>a</sup> | HQ Aligned Bases <sup>a</sup> | Error Rate <sup>bc</sup> |
|---------------------------------------------------------------------------------------------------------------------------------------------------------|----------------------|----------|-------------|-------------------------------|-------------------------------|--------------------------|
| Phusion HS II                                                                                                                                           | NF-15c               | Calculus | 444         | 444                           | 33,371                        | 0.0115                   |
|                                                                                                                                                         | NF-95c               | Calculus | 819         | 819                           | 61,220                        | 0.0091                   |
|                                                                                                                                                         | NF-217c              | Calculus | 1,513       | 1,513                         | 125,188                       | 0.0081                   |
|                                                                                                                                                         | NF-262c              | Calculus | 1,693       | 1,693                         | 148,294                       | 0.0105                   |
|                                                                                                                                                         | <i>Mean Calculus</i> |          |             |                               |                               | <b>0.0098</b>            |
|                                                                                                                                                         | NF-47d               | Dentine  | 29,856      | 29,856                        | 3,513,573                     | 0.0159                   |
|                                                                                                                                                         | NF-217d              | Dentine  | 3,880       | 3,880                         | 277,582                       | 0.0163                   |
|                                                                                                                                                         | <i>Mean Dentine</i>  |          |             |                               |                               | <b>0.0161</b>            |
| <i>Mean Total</i>                                                                                                                                       |                      |          |             |                               | <b>0.0119</b>                 |                          |
| Platinum HiFi                                                                                                                                           | NF-15c               | Calculus | 1,209       | 1,209                         | 83,403                        | 0.0169                   |
|                                                                                                                                                         | NF-47c               | Calculus | 1,516       | 1,516                         | 119,238                       | 0.0172                   |
|                                                                                                                                                         | NF-95c               | Calculus | 1,237       | 1,237                         | 86,110                        | 0.0153                   |
|                                                                                                                                                         | NF-108c              | Calculus | 632         | 632                           | 58,178                        | 0.0183                   |
|                                                                                                                                                         | NF-217c              | Calculus | 1,236       | 1,236                         | 95,906                        | 0.0162                   |
|                                                                                                                                                         | NF-262c              | Calculus | 1,022       | 1,022                         | 82,354                        | 0.0173                   |
|                                                                                                                                                         | <i>Mean Calculus</i> |          |             |                               |                               | <b>0.0169</b>            |
|                                                                                                                                                         | NF-47d               | Dentine  | 33,509      | 33,509                        | 5,195,634                     | 0.0263                   |
|                                                                                                                                                         | NF-217d              | Dentine  | 1,731       | 1,731                         | 105,385                       | 0.0206                   |
|                                                                                                                                                         | <i>Mean Dentine</i>  |          |             |                               |                               | <b>0.0235</b>            |
| <i>Mean Total</i>                                                                                                                                       |                      |          |             |                               | <b>0.0185</b>                 |                          |
| KAPA HiFi +U                                                                                                                                            | NF-108c              | Calculus | 3,095       | 3,095                         | 313,174                       | 0.0216                   |
|                                                                                                                                                         | NF-217c              | Calculus | 2,135       | 2,135                         | 184,578                       | 0.0159                   |
|                                                                                                                                                         | NF-262c              | Calculus | 4,284       | 4,284                         | 395,619                       | 0.0205                   |
|                                                                                                                                                         | NF-95c               | Calculus | 1,452       | 1,452                         | 107,412                       | 0.0155                   |
|                                                                                                                                                         | <i>Mean Calculus</i> |          |             |                               |                               | <b>0.0184</b>            |
|                                                                                                                                                         | NF-217d              | Dentine  | 29,467      | 29,467                        | 2,922,347                     | 0.0337                   |
|                                                                                                                                                         | <i>Mean Dentine</i>  |          |             |                               |                               | <b>0.0337</b>            |
| <i>Mean Total</i>                                                                                                                                       |                      |          |             |                               | <b>0.0214</b>                 |                          |
| <i>Notes:</i>                                                                                                                                           |                      |          |             |                               |                               |                          |
| <sup>a</sup> HQ signifies high quality                                                                                                                  |                      |          |             |                               |                               |                          |
| <sup>b</sup> Geneious R8 software (Biomatters) was used to generate consensus FASTA sequences and for subsequent read mapping.                          |                      |          |             |                               |                               |                          |
| <sup>c</sup> Substitution error was calculated using Picard Tools v 1.137 ( <a href="http://picard.sourceforge.net">http://picard.sourceforge.net</a> ) |                      |          |             |                               |                               |                          |

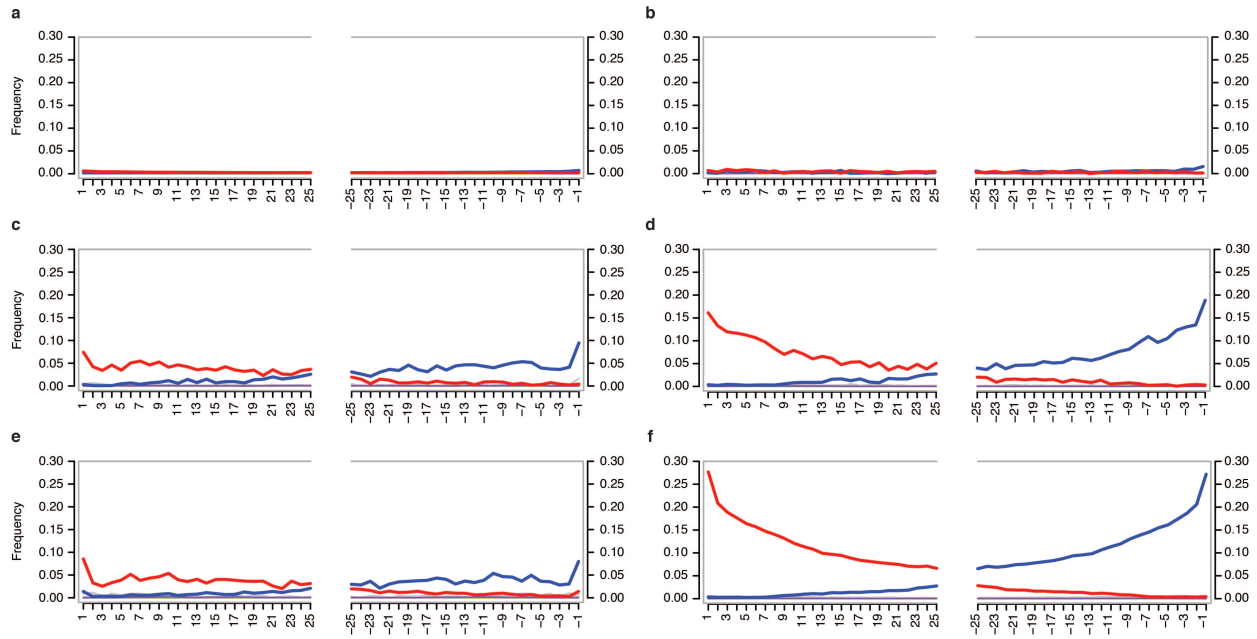

**Supplementary Figure 1. Damage profiles for one ancient and two modern samples. (a)** pre-capture MOD-1 dental calculus. **(b)** pre-capture MOD-2 dental calculus. **(c)** pre-capture NF-217 dental calculus. **(d)** pre-capture NF-217 dentine. **(e)** post-capture NF-217 calculus. **(f)** post-capture NF-217 dentine. C>T transitions are indicated in red; G>A transitions are indicated in blue. Modern samples **(a, b)** show little to no damage, while ancient samples **(c-f)** exhibit evidence of heightened miscoding lesions at the fragment termini. Note that damage levels are higher in dentine **(d, f)** than in calculus **(c, e)**, and higher in post-capture libraries **(e, f)** than in pre-capture libraries **(c, d)**. The remaining archaeological samples (NF-15, NF-47, NF-95, NF-108, NF-262) show similar damage patterns. Damage profiles were generated using MapDamage 2.0.

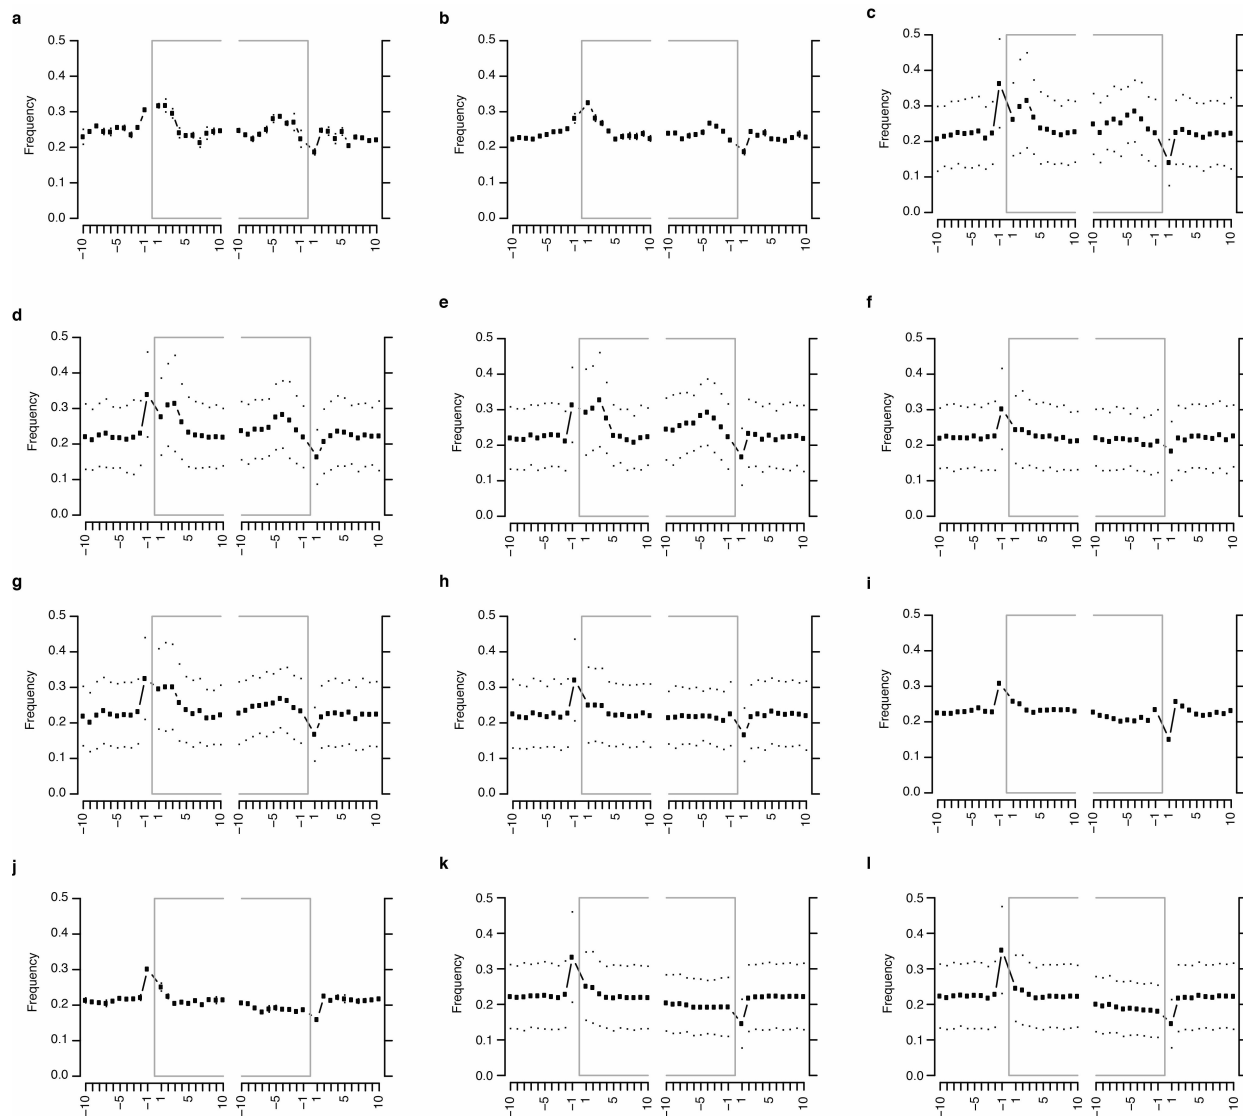

**Supplementary Figure 2. DNA fragmentation profile for ancient dental calculus (a-h) and dentine (i-l) samples.** A 5' -1 enrichment of the purine guanine is observed for all samples. (a) pre-capture NF-47c. (b) pre-capture NF-217c. (c) post-capture NF-15c. (d) post-capture NF-47c. (e) post-capture NF-95c. (f) post-capture NF-108c. (g) post-capture NF-217c. (h) post-capture NF-262c. (i) pre-capture NF-47d. (j) pre-capture NF217d. (k) post-capture NF-47d. (l) post-capture NF-217d. DNA fragmentation profiles were generated using MapDamage 2.0

**Supplementary Data File 1.** HaploGrep formatted input file (.hsd) of mitochondrial variants in Norris Farms samples.

**Supplementary Data File 2.** FASTA file of combined consensus mitogenome sequences for individuals NF-15, NF-47, NF-95, NF-108, NF-217, and NF-262.

**Supplementary Data File 3.** FASTA file of NF-217 mitogenome consensus sequences for dental calculus and dentine enzyme libraries.
